# Supplementary material
Source: publisher figshare collection journal article supplement (https://tandf.figshare.com/articles/dataset/_/19766216)
Supplement: Supplementary file 1 [file 1]

A.

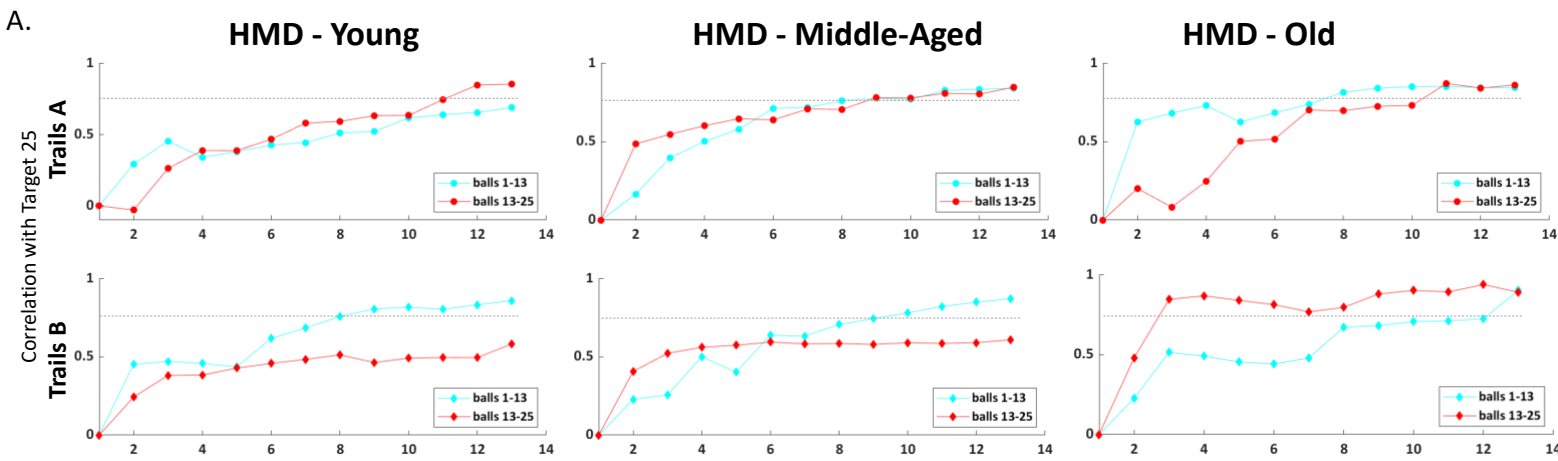

B.

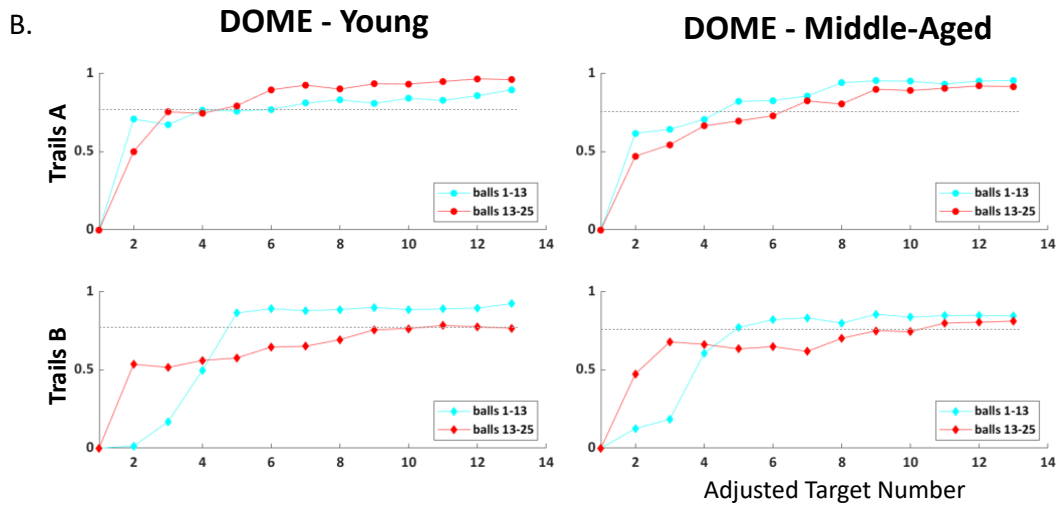

C.

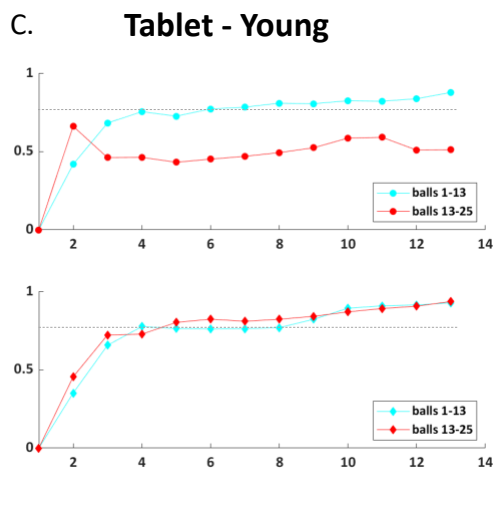

**Sup Figure 1. The two halves of the VR-CTT test reliably represent the total test score.** The same analysis as Figure 1, performed for 2 subsets of targets of Trails A (targets 1-13; light blue, and targets 13-25; red). The timing of the 13<sup>th</sup> target was subtracted from each timing to reach targets 13-25, to simulate the 13<sup>th</sup> as the first target in the second segment of the test. Plotted separately for Trails A and Trails B in HMD (A), DOME (B), and Tablet (C) platforms. Dashed line denotes the 0.8 correlation threshold.
